# Supplementary material for: Hair follicle stem cell replication stress drives IFI16/STING-dependent inflammation in hidradenitis suppurativa
Source: JCI journal article supplement (doi:10.1172/jci131180), 2020-04-02
Supplement: sd1 [file 1]

## **SUPPLEMENTARY MATERIAL**

### **Supplementary Figures**

#### **Supplementary Fig. S1**

Representative cell-cycle data obtained after Dean-Jett Fox modeling. The G1, S, and G2 phases are shown in blue, yellow, and green, respectively.

#### **Supplementary Fig. S2**

Western blot analysis of CHK2 levels

#### **Supplementary Fig. S3**

Immunofluorescence evaluation of spontaneous CHK1 phosphorylation in freshly isolated hair-follicle cells from patients with hidradenitis suppurativa

(A) Representative image showing phosphoCHK1 in green and CD49f in red

(B) Representative image showing phosphoCHK1 in green and CD34 in red

Figure S1

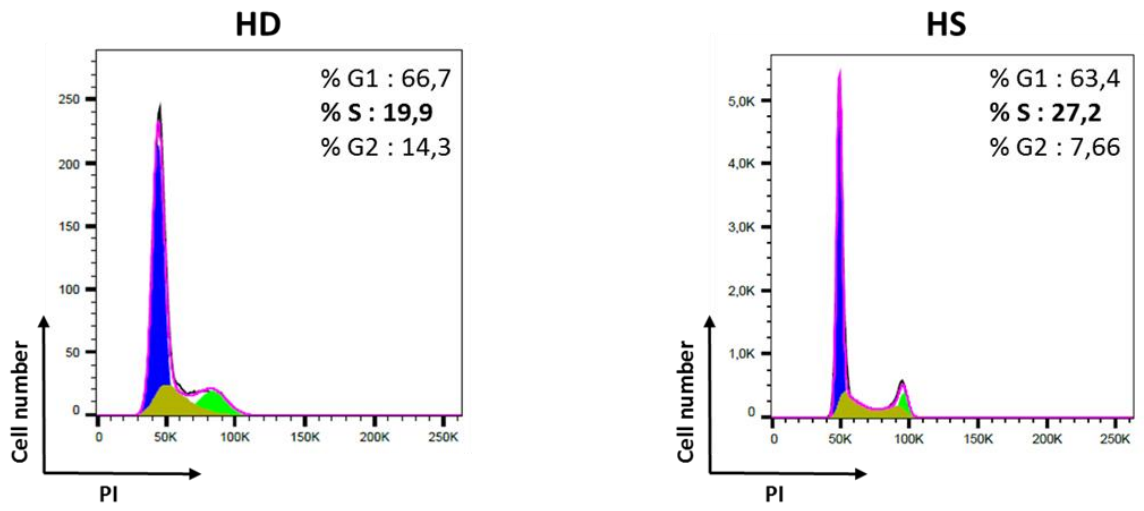

Figure S2

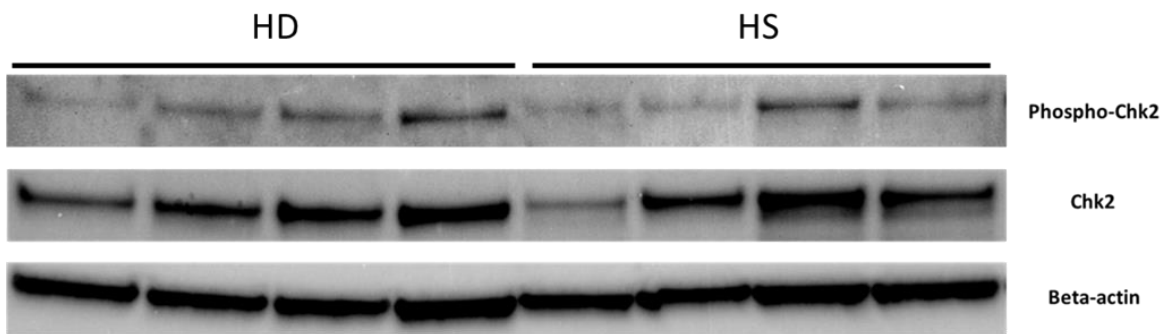

Figure S3

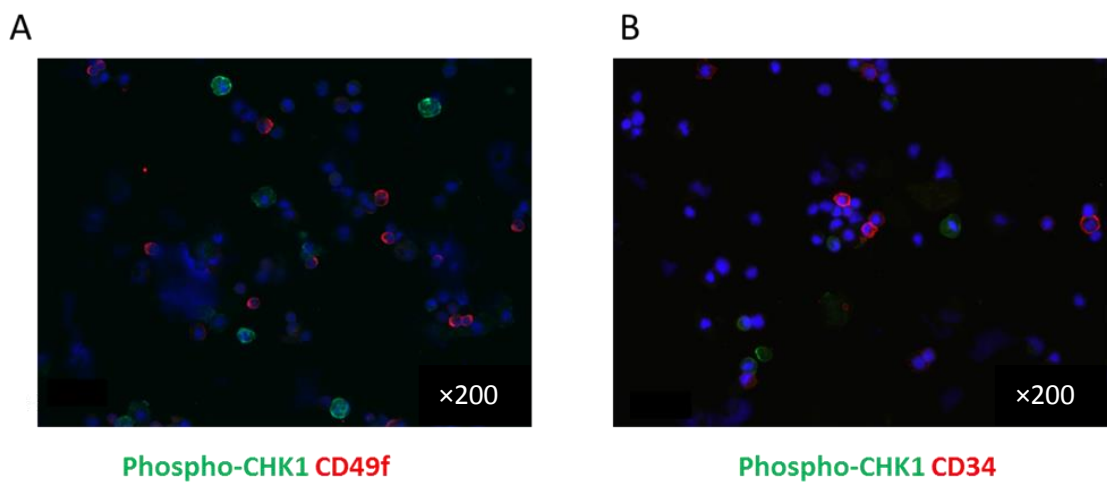

## Supplementary tables

| Target                             | Species | Provider                    | Clone      | Dilution |
|------------------------------------|---------|-----------------------------|------------|----------|
| <b>Phospho-IRF3</b>                | Rabbit  | Abcam                       | EPR2346    | 1/1000   |
| <b>IRF3</b>                        | Rabbit  | CST                         | D83B9      | 1/1000   |
| <b>Phospho-CHK1 (Ser345)</b>       | Rabbit  | CST                         | 133D3      | 1/1000   |
| <b>Phospho-CHK2 (Thr68)</b>        | Rabbit  | CST                         | Polyclonal | 1/1000   |
| <b>CHK1</b>                        | Mouse   | CST                         | 2G1D5      | 1/1000   |
| <b>CHK2</b>                        | Mouse   | CST                         | 1C12       | 1/1000   |
| <b>STING</b>                       | Rabbit  | CST                         | D2P2F      | 1/1000   |
| <b>cGAS</b>                        | Rabbit  | CST                         | D1D3G      | 1/1000   |
| <b>IFI16</b>                       | Mouse   | Santa Cruz<br>Biotechnology | 1G7        | 1/200    |
| <b>β-actin</b>                     | Mouse   | ThermoFisher                | BA3R       | 1/20000  |
| <b>Anti-mouse IgG, HRP-linked</b>  | Goat    | CST                         | Polyclonal | 1/2000   |
| <b>Anti-rabbit IgG, HRP-linked</b> | Goat    | CST                         | Polyclonal | 1/2000   |

Supplementary Table 1: Antibodies used for western blot

**Supplementary Table S2: Antibodies used for immunocytochemistry**

| Target                         | Permeabilization              | Blocking                                             | Primary Antibody                                                                      | Secondary antibody                                              |
|--------------------------------|-------------------------------|------------------------------------------------------|---------------------------------------------------------------------------------------|-----------------------------------------------------------------|
| <b>Phospho-CHK1</b>            | 10 minutes<br>PBS-Triton 0,2% | 1 h PBS-<br>0.1% Tween<br>+ 2% BSA                   | Rabbit clone 133D3 (CST)<br>1/50 in blocking buffer<br>Overnight incubation at<br>4°C | Anti-rabbit AF488 (Abcam)<br>1/600 in blocking buffer           |
| <b>Phospho-H<sub>2</sub>AX</b> | 10 minutes<br>PBS-Triton 0,1% | 2 h PBS-<br>0,3% Triton<br>+ 5% Normal<br>Goat serum | Rabbit clone 20E3 (CST)<br>1/1000 PBS-1% BSA-0.3%<br>Triton<br>ON at 4°C              | Anti-rabbit AF488 (Abcam)<br>1/600 in PBS-1% BSA-0.3%<br>Triton |
| <b>53BP1</b>                   | 15 minutes<br>PBS-Triton 0,1% | 1 h PBS + 5%<br>human<br>serum AB                    | Rabbit polyclonal (Bethyl)<br>1/20 in PBS 5% Human<br>Serum AB<br>1h at RT            | Anti-rabbit AF488 (Abcam)<br>1/600 in 5% normal goat<br>serum   |
| <b>ssDNA</b>                   | 15 minutes<br>PBS-Triton 0,1% | 1 h PBS + 5%<br>human<br>serum AB                    | Mouse clone F7-26,<br>(Merck) 1/20 in PBS 5%<br>human serum AB<br>1h at RT            | Anti-mouse AF488 (Abcam)<br>1/800 in 5% normal goat<br>serum    |
| <b>Lamin B1</b>                | 10 minutes<br>PBS-Triton 0,2% | 1 h PBS-<br>0,1% Tween<br>3% BSA                     | Rabbit Polyclonal (Abcam)<br>1/1000 in PBS 3% BSA<br>1h at RT                         | Anti-rabbit AF488 (Abcam)<br>1/600 in blocking buffer           |
| <b>Cytokeratin 15</b>          | 10 minutes<br>PBS-Triton 0,2% | 1 h PBS-<br>0.1% Tween<br>+ 2% BSA                   | Mouse clone LHK15<br>(Thermo Scientific)<br>1/50 in blocking buffer                   | Anti-mouse AF555 (Abcam)<br>1/600 in blocking buffer            |
| <b>CD45</b>                    | -                             | 1 h PBS 2%<br>BSA                                    | Mouse clone 2B11+PD726<br>(DAKO)<br>1/500 in blocking buffer                          | Anti-mouse AF555 (Abcam)<br>1/600 in 5% normal goat<br>serum    |
| <b>CD49f</b>                   | -                             | 1 h PBS 2%<br>BSA                                    | Rat clone G0H3<br>(BioLegend)<br>1/200 in blocking buffer                             | Anti-rat AF555 (Biolegend)<br>1/200 in blocking buffer          |
| <b>CD34</b>                    | -                             | 1 h PBS 2%<br>BSA                                    | Mouse clone QBEND/10,<br>(eBioscience)<br>1/50 in blocking buffer                     | Anti-mouse AF488 (Abcam)<br>1/600 in 5% normal goat<br>serum    |
| <b>IFI16</b>                   | 10 minutes<br>PBS-Triton 0,2% | 1 h PBS-<br>0.1% Tween<br>+ 2% BSA                   | Mouse sc-8023<br>(Clone 1G7, Santa Cruz)<br>1/50 in blocking buffer                   | Anti-mouse AF488 (Abcam)<br>1/800 in blocking buffer            |
